# Supplementary material for: Association of Tracheostomy with Changes in Sedation during COVID-19: A Quality Improvement Evaluation at the University of Michigan
Source: PubMed Central journal article supplement — Ann Am Thorac Soc. 2021 May;18(5):907–9. doi: 10.1513/AnnalsATS.202009-1096RL (PMC8086533; doi:10.1513/annalsats.202009-1096rl), 2021-05
Supplement: AnnalsATS.202009-1096RL_cagino_data_supplement.pdf [file AnnalsATS.202009-1096RL_cagino_data_supplement.pdf]

Association of Tracheostomy with Changes in Sedation During COVID-19: A Quality Improvement Evaluation at University of Michigan

Supplemental Appendix: Analytical Code

Leigh M Cagino, MD, Jacquelyn B Kercheval, BA, Michael T Kenes, PharmD, Jakob I McSparron, MD, Ross Blank, MD, Steven B Chinn, MD, MPH, Dru D Claar, MD, Theodore J Iwashyna, MD, PhD, Jose De Cardenas, MD

```

1  /* Code to analyze the association of Perc Trachs with sedation of
2     with COVID-19
3
4     Trachs by Pepe Cardenas + ENT Colleagues
5     ICU care supervised by Jake McSparron, Ross Blank, and Dru Claar
6     Data abstracted by Leigh Cagino, Michael Kenes, and Jacqueline
Kercheval
7     Analytic code by Jack Iwashyna
8
9     Cleaning runs
10    v01 30 April 2020
11    v02 1 May 2020
12    v03 4 May 2020
13
14    Cleaning and Analysis
15    * already reconciled data
16    v01 26 May 2020
17    v02 8 June 2020
18
19  */
20
21  set more off
22  clear
23
24  /* net install cleanplots,
25     from("https://tdmize.github.io/data/cleanplots") */
26  /* think about finding uncluttered
27     https://github.com/graykimbrough/uncluttered-stata-graphs
28     and colorblind */
29  /* ssc install catplot */
30  /* ssc install splitvallabels */
31
32  set scheme cleanplots
33
34  import delimited "/Users/tiwashyn/Documents/Documents - MacBook
35  Air 2019 the replacement/COVID19/Perc Trachs and
36  Sedation/data/Perc trach data FINAL.csv"
37
38  /* other errors corrected below */
39  /*
40  versed doses present twice when versed_admin ==1 */
41
42  drop if missing(record_id)
43
44  /* Correct known errors */
45  replace fentanyl_dose_bt5=3752.5 if record_id==13
46  replace fentanyl_dose_at5=1 if record_id==3

```

```
49 gen date_trach = date(pt_trach_date, "MDY", 2020)
50
51 gen days_admit_to_trach = date_trach - date_admit
52 gen days_tube_to_trach = date_trach - date_intubate
53 gen male = (pt_sex=="M") if !missing(pt_sex)
54
55 sum pt_age days_admit_to_trach days_tube_to_trach male
   sedative_indicated
56
57 drop if sedative_indicated
58 sum pt_age days_admit_to_trach days_tube_to_trach male
   sedative_indicated
59
60
61
62 drop rass_time*
63 drop camicu_time*
64 drop after*
65 drop before*
66 drop indication*
67
68 rename *bt5 *_1
69 rename *bt5__1 *_1_1
70 rename *bt4 *_2
71 rename *bt4__1 *_1_2
72 rename *bt3 *_3
73 rename *bt3__1 *_1_3
74 rename *bt2 *_4
75 rename *bt2__1 *_1_4
76 rename *bt1 *_5
77 rename *bt1__1 *_1_5
78
79 rename *t0 *_6
80 rename *t0__1 *_1_6
81
82 rename *at1 *_7
83 rename *at1__1 *_1_7
84 rename *at2 *_8
85 rename *at2__1 *_1_8
86 rename *at3 *_9
87 rename *at3__1 *_1_9
88 rename *at4 *_10
89 rename *at4__1 *_1_10
90 rename *at5 *_11
91 rename *at5__1 *_1_11
92
93 forvalues dd=1/11{
94     forvalues xx=1/5 {
```

```

100         quietly: rename camicu_score`xx'__`dd'_temp
camicu_score`xx'__`dd'
101         /* di "changed it" */
102         }
103     }
104 }
105
106 forvalues dd=1/11{
107     forvalues xx=1/5 {
108         gen cam`xx'__`dd'=ustrtrim(camicu_score`xx'__`dd')
109         replace cam`xx'__`dd'="POS" if cam`xx'__`dd'=="pos"
110         drop camicu_score`xx'__`dd'
111     }
112 }
113
114 foreach dd in 1 2 3 4 5 6 8 9 10 11{
115     gen rass_score21__`dd'=.
116     gen rass_score22__`dd'=.
117     gen rass_score23__`dd'=.
118 }
119
120 reshape long fentanyl_dose__ fentanyl_admin__1_ ///
121     prop_dose__ prop_admin__1_ versed_dose__ versed_admin__1_ ///
122     prec_dose__ prec_admin__1_ ketamine_dose__ ketamine_admin__1_
///
123     pheno_dose__ pheno_admin__1_ oxy_dose__ oxy_admin__1_ ///
124     oralmorph_dose__ oralmorph_admin__1_ ivmorph_dose__
ivmorph_admin__1_ ///
125     dilaudid_dose__ dilaudid_admin__1_ ivdilaudid_dose__
ivdilaudid_admin__1_ ///
126     ativan_dose__ ativan_admin__1_ ivativan_dose__
ivativan_admin__1_ ///
127     diazepam_dose__ diazepam_admin__1_ ivdiazepam_dose__
ivdiazepam_admin__1_ ///
128     xanax_dose__ xanax_admin__1_ ivxanax_dose__ ivxanax_admin__1_
///
129     ivhaldol_dose__ ivhaldol_admin__1_ oralhaldol_dose__
oralhaldol_admin__1_ ///
130     seroquel_dose__ seroquel_admin__1_ ivseroquel_dose__
ivseroquel_admin__1_ ///
131     remeron_dose__ remeron_admin__1_ zyprexa_dose__
zyprexa_admin__1_ ///
132     ivzyprexa_dose__ ivzyprexa_admin__1_ ///
133     neuromusc_blockade__ pressors__ sat__ sbt__ mask_trial__ ///
134     physical_therapy__ vent__ pressure_support__
sevenday_survival__ ///
135     rass_score1__ rass_score2__ rass_score3__ rass_score4__
rass_score5__ ///

```

```

141
142 gen daycentered = day-6
143 label var daycentered "Days to/from Trach"
144
145 egen rass_mean = rowmean(rass_score*__)
146 egen rass_min = rowmin(rass_score*__)
147 egen rass_max = rowmax(rass_score*__)
148 gen rass_var=rass_max-rass_min
149
150 gen nocoma_min=(rass_min>=-2)
151 gen nocoma_max=(rass_max>=-2)
152 gen nocoma_min4=(rass_min>-4)
153 gen nocoma_max4=(rass_max>-4)
154 gen notdelirious_ever = (cam1__=="NEG") | (cam2__=="NEG") | (cam3__
=="NEG") ///
155     | (cam4__=="NEG") | (cam5__=="NEG")
156
157 gen notdelirious_wholeday = (cam1__=="NEG")
158 replace notdelirious_wholeday = 0 if notdelirious_wholeday==1 & ///
159     ((cam2__=="NEG" & !missing(cam2__)) | missing(cam2__))==0
160 replace notdelirious_wholeday = 0 if notdelirious_wholeday==1 & ///
161     ((cam3__=="NEG" & !missing(cam3__)) | missing(cam3__))==0
162 replace notdelirious_wholeday = 0 if notdelirious_wholeday==1 & ///
163     ((cam4__=="NEG" & !missing(cam4__)) | missing(cam4__))==0
164 replace notdelirious_wholeday = 0 if notdelirious_wholeday==1 & ///
165     ((cam5__=="NEG" & !missing(cam5__)) | missing(cam5__))==0
166
167 gen agitated=(rass_max>=3)
168
169 replace fentanyl_dose__ = 0 if missing(fentanyl_dose__) &
fentanyl_admin__1__==1
170 replace ivdilaudid_dose__=0 if ivdilaudid_admin__1__==1
171 replace oxy_dose__=0 if oxy_admin__1__==1
172 replace oralmorph_dose__=0 if oralmorph_admin__1__==1
173 replace ivmorph_dose__=0 if ivmorph_admin__1__==1
174 replace dilaudid_dose__=0 if dilaudid_admin__1__==1
175
176
177 replace prec_dose__ = 0 if missing(prec_dose__) & prec_admin__1__==1
178 replace prop_dose__ = 0 if missing(prop_dose__) & prop_admin__1__==1
179
180
181 gen num_opiates = (fentanyl_dose__>0 & !missing(fentanyl_dose__))
///
182     + (oxy_dose__>0 & !missing(oxy_dose__)) + (oralmorph_dose__>0 &
!missing(oralmorph_dose__)) ///
183     + (ivmorph_dose__>0 & !missing(ivmorph_dose__)) + (
dilaudid_dose__>0 & !missing(dilaudid_dose__)) ///

```

```

189     + (ivdiazepam_dose__>0 & !missing(ivdiazepam_dose__)) ///
190     + (xanax_dose__>0 & !missing(xanax_dose__)) ///
191     + (ivxanax_dose__>0 & !missing(ivxanax_dose__)) ///
192     + (versed_dose__>0 & !missing(versed_dose__))
193
194 gen num_antipsych = (ivhaldol_dose__>0 & !missing(ivhaldol_dose__))
    ///
195     + (oralhaldol_dose__>0 & !missing(oralhaldol_dose__)) ///
196     + (seroquel_dose__>0 & !missing(seroquel_dose__)) ///
197     + (ivseroquel_dose__>0 & !missing(ivseroquel_dose__)) ///
198     + (remeron_dose__>0 & !missing(remeron_dose__)) ///
199     + (zyprexa_dose__>0 & !missing(zyprexa_dose__)) ///
200     + (ivzyprexa_dose__>0 & !missing(ivzyprexa_dose__))
201
202 gen any_antipsych = num_antipsych>0
203
204 gen num_others = (prop_dose__>0 & !missing(prop_dose__)) ///
205     + (prec_dose__>0 & !missing(prec_dose__)) + (ketamine_dose__>0
    & !missing(ketamine_dose__)) ///
206     + (pheno_dose__>0 & !missing(pheno_dose__))
207
208 gen num_drugs = num_opiates + num_others + num_benzos +
    num_antipsych
209
210 label var num_opiates "Opiates"
211 label var num_drugs "All Sedatives"
212 label var num_others "Newer Agents"
213
214 gen fentanyl_equiv = (fentanyl_dose__ + ((100/1.5) *
    ivdilaudid_dose__) + ((100/20) * oxy_dose__) ///
215     + ((100/30) * oralmorph_dose__) + ((100/10) * ivmorph_dose__ )
    + ((100/5) * dilaudid_dose__)) / 1000
216
217 gen noopiates=(fentanyl_equiv==0)
218
219 replace ivativan_dose__=0 if ivativan_admin__1__==1
220 replace ativan_dose__=0 if ativan_admin__1__==1
221 replace versed_dose__=0 if versed_admin__1__==1
222 replace diazepam_dose__=0 if diazepam_admin__1__==1
223 gen ativan_equiv = ativan_dose__ + ivativan_dose__ + (0.2*
    diazepam_dose__) + (0.5*versed_dose__)
224
225 gen nobenzo = ativan_equiv==0 & ! missing(ativan_equiv)
226
227 gen any_benzo = ativan_equiv>0 | missing(ativan_equiv)
228
229 gen nofentanyl=(fentanyl_admin__1__==1) if !missing(
    fentanyl_admin__1__)

```

```

235 table daycentered, c(mean ativan_equiv mean nobenzo) format(%9.2f)
236
237
238 xtset pt_mrn daycentered
239 gen aftertrach = daycentered
240 recode aftertrach (min/-1=0) (0=.) (1/max=1)
241 gen daycentered_nozero = daycentered if daycentered!=0
242 label var daycentered_nozero "Days to/from Trach"
243
244 /* REPORT ANALYSES */
245
246 /* H1 */
247
248 table aftertrach, c(median num_drugs mean num_drugs sd num_drugs)
format(%9.2f) center
249 table aftertrach, c(median fentanyl_equiv mean fentanyl_equiv sd
fentanyl_equiv mean neuromusc_blockade__) format(%9.2f) center
250 xtreg fentanyl_equiv aftertrach, fe
251 xtlogit noopiates aftertrach, fe
252
253 table aftertrach, c(median ativan_equiv mean any_benzo mean
ativan_equiv sd ativan_equiv) format(%9.2f) center
254 table aftertrach, c(median prec_dose median prop_dose mean
any_antipsych) format(%9.2f) center
255
256 xtlogit any_benzo aftertrach, fe
257 xtlogit any_antipsych aftertrach, fe
258
259 dotplot fentanyl_equiv, over(daycentered_nozero) ///
260     ytitle("mg Fentanyl Equivalents (Total Daily Opiate Dose)")
center median bar ///
261     note("8 June 2020 10:30 a.m. -- Day of trach values not
graphed")
262
263 /* H2 */
264
265 table aftertrach, c(median rass_mean mean rass_mean sd rass_mean )
format(%9.2f) center
266 table aftertrach, c(mean nocoma_min mean agitated mean
notdelirious_ever mean physical_therapy__) format(%9.2f) center
267 table aftertrach, c(mean physical_therapy__) format(%9.2f) center
268
269 xtreg rass_mean aftertrach, fe
270
271 xtlogit nocoma_min aftertrach, fe or
272 xtlogit agitated aftertrach, fe or
273 xtlogit notdelirious_ever aftertrach, fe or
274 xtlogit physical_therapy__ aftertrach, fe or

```

```

280  /* H3 */
281
282  mkspline daysall 0 daysafter = daycentered, marginal
283  xtreg fentanyl_equiv daycentered aftertrach daysafter, fe
284  xtreg rass_mean daycentered aftertrach daysafter, fe
285  xtlogit nocoma_min daycentered aftertrach daysafter, fe or
286  xtlogit agitated daycentered aftertrach daysafter, fe or
287  xtlogit physical_therapy__ daycentered aftertrach daysafter, fe or
288
289  /* explore variations suggested by Leigh and Jackie */
290
291  gen day21plus = days_tube_to_trach >21
292  sum day21plus
293
294  gen after_by_day21 = aftertrach * day21plus
295  xtreg fentanyl_equiv aftertrach after_by_day21, fe
296  xtreg fentanyl_equiv daycentered aftertrach after_by_day21, fe
297
298  xtreg fentanyl_equiv daycentered aftertrach if daycentered!=1, fe
299
300  /* requested at early July by coauthors */
301
302  dotplot ativan_equiv, over(daycentered_nozero) ///
303      ytitle("mg Ativan Equivalents (Total Daily Benzo Dose)") center
304      median bar ///
305      note("8 June 2020 10:30 a.m. -- Day of trach values not
306      graphed")
307
308  xtreg num_antipsych aftertrach, fe
309  table aftertrach, c(mean num_antipsych median num_antipsych) format
310  (%9.2f) center
311
312  table aftertrach, c(mean num_antipsych median num_antipsych) format
313  (%9.2f) center
314  table daycentered, c(mean sbt__) format(%9.2f) center
315  table aftertrach, c(mean sbt__) format(%9.2f) center
316
317  xtlogit sbt__ aftertrach, fe or
318  xtlogit sbt__ daycentered aftertrach daysafter, fe or
319
320  table aftertrach, c(mean nocoma_min4 mean nocoma_max4) format(%9.2f
321  ) center
322  xtlogit nocoma_min4 aftertrach, fe or
323  xtlogit nocoma_min4 daycentered aftertrach daysafter, fe or
324
325  table daycentered, c(mean notdelirious_wholeday) format(%9.2f)
326  center
327  table aftertrach, c(mean notdelirious_wholeday) format(%9.2f)

```



```

trach values not graphed")
328
329 xtline fentanyl_equiv if daycentered!=0, overlay legend(off) ///
330     ytitle("Fentanyl Equivalents (Total Daily Opiate Dose)") ///
331     note("VERY PRELIMINARY -- NOT FOR INTERPRETATION -- Day of
trach values not graphed")
332
333 xtline ativan_equiv if daycentered!=0, overlay legend(off) ///
334     ytitle("Ativan Equivalents (Total Daily Benzo Dose)") ///
335     note("VERY PRELIMINARY -- NOT FOR INTERPRETATION -- Day of
trach values not graphed")
336
337 xtline prop_dose__ if daycentered!=0, overlay legend(off) ///
338     ytitle("Propofol (Total Daily Dose)") ///
339     note("VERY PRELIMINARY -- NOT FOR INTERPRETATION -- Day of
trach values not graphed")
340
341 xtline prec_dose__ if daycentered!=0, overlay legend(off) ///
342     ytitle("Dexmedetomidine (Total Daily Dose)") ///
343     note("VERY PRELIMINARY -- NOT FOR INTERPRETATION -- Day of
trach values not graphed")
344
345 xtline rass_mean if daycentered!=0, overlay legend(off) ///
346     ytitle("RASS (daily mean of all recorded values)") ///
347     note("VERY PRELIMINARY -- NOT FOR INTERPRETATION -- Day of
trach values not graphed")
348
349 /* stacked bar graphs */
350
351 catplot num_drugs daycentered, ///
352     percent(daycentered) ///
353     asyvars stack recast(bar) ///
354     bar(1, bcolor(sandb)) bar(2, bcolor(yellow)) bar(3,
bcolor(orange_red)) ///
355     bar(4, bcolor(red)) bar(5, bcolor(purple)) bar(6,
bcolor(brown)) ///
356     bar(7, bcolor(maroon)) bar(8, bcolor(gs7)) ///
357     bar(9, bcolor(black)) ///
358     legend(subtitle("Number of Drugs") order(9 8 7 6 5 4 3 2 1)) ///
359     ytitle("Percentage of Patients") ///
360     title("Agents Used") ///
361     note("VERY PRELIMINARY -- NOT FOR INTERPRETATION")
362
363 /* okay, let's do average doses across 5 days before versus 5 days
after */
364
365 replace prec_dose__ = 0 if missing(prec_dose__) & prec_admin__1_==1
366 replace prop_dose__ = 0 if missing(prop_dose__) & prop_admin__1_==1

```

```
373 ** note that using aftertrach drops trach day on its own!
374 xtreg fentanyl_equiv aftertrach, fe
375 xtreg num_drugs aftertrach, fe
376 xtreg rass_mean aftertrach, fe
377
378 /* xtreg for dose over time */
379
380 xtreg fentanyl_equiv daycentered aftertrach, fe
381 xtreg num_drugs daycentered aftertrach, fe
382 xtreg rass_mean daycentered aftertrach, fe
383
384 mkspline daysall 0 daysafter = daycentered, marginal
385 xtreg fentanyl_equiv daysall aftertrach daysafter, fe
386 xtreg num_drugs daysall aftertrach daysafter, fe
387 xtreg rass_mean daysall aftertrach daysafter, fe
388
389 /* clogit for receipt and receipt over time */
390
391 xtlogit notdelirious_ever daysall aftertrach, fe
392 xtlogit notdelirious_ever daysall aftertrach daysafter, fe
393
394 xtlogit noopiates aftertrach, fe
395 xtlogit noopiate daysall aftertrach daysafter, fe
396
397 xtlogit nobenzo aftertrach, fe
398 xtlogit nobenzo aftertrach daycentered, fe
399 xtlogit nobenzo daysall aftertrach daysafter, fe
400
401 xtlogit sbt__ aftertrach, fe
402 xtlogit sbt__ aftertrach daycentered, fe
403 xtlogit sbt__ daysall aftertrach daysafter, fe
404
405 xtlogit neuromusc_blockade__ aftertrach, fe
406 xtlogit neuromusc_blockade__ aftertrach daycentered, fe
407 /* convergence error: xtlogit neuromusc_blockade__ daysall
aftertrach daysafter, fe */
408
409 xtlogit physical_therapy__ aftertrach, fe
410 xtlogit physical_therapy__ aftertrach daycentered, fe
411 xtlogit physical_therapy__ daysall aftertrach daysafter, fe
412
413
414
```

414
